# Supplementary material for: The partially controllable growth trend of carbon nanoparticles in solid-state pyrolysis of organometallic precursor by introducing POSS units, and their magnetic properties
Source: Royal Society of Chemistry journal article supplement (doi:10.1039/c5ra05375g), 2015-01-01
Supplement: c5ra05375g1.pdf [file c5ra05375g1.pdf]

## Electronic Supplementary Information (ESI)

# The partially controllable growth trend of carbon nanoparticles in solid-state pyrolysis of organometallic precursor by introducing POSS units, and their magnetic properties

Zhijun Ruan, Jingui Qin, and Zhen Li\*

Department of Chemistry, Hubei Key Lab on Organic and Polymeric Opto-Electronic Materials,  
Wuhan University, Wuhan 430072, China

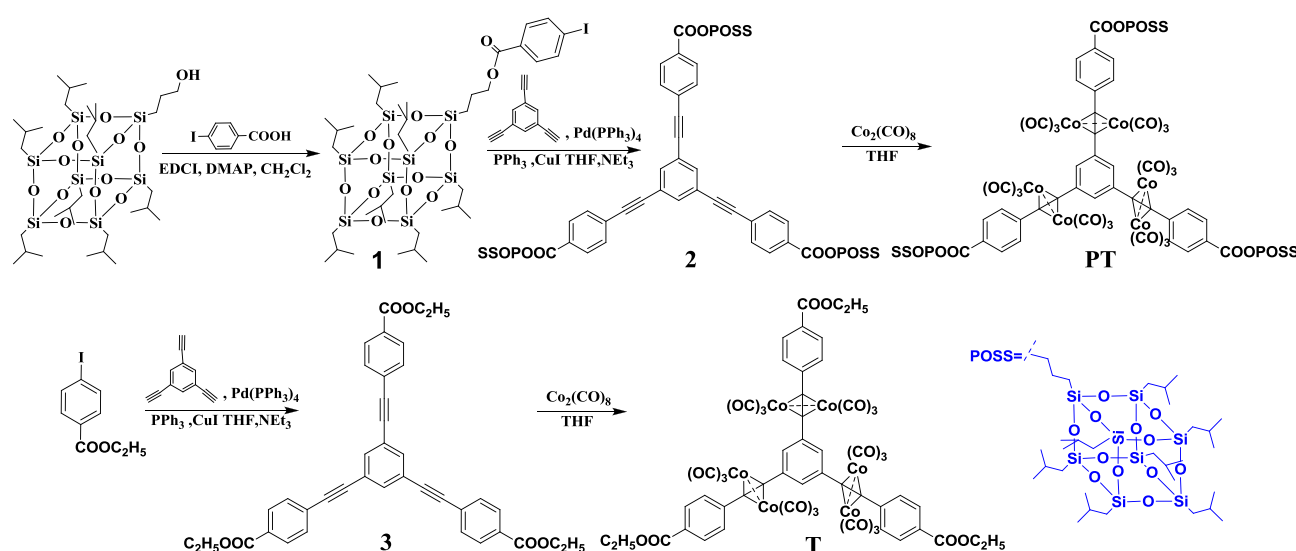

**Scheme S1.** Synthetic pathway of **PT**.

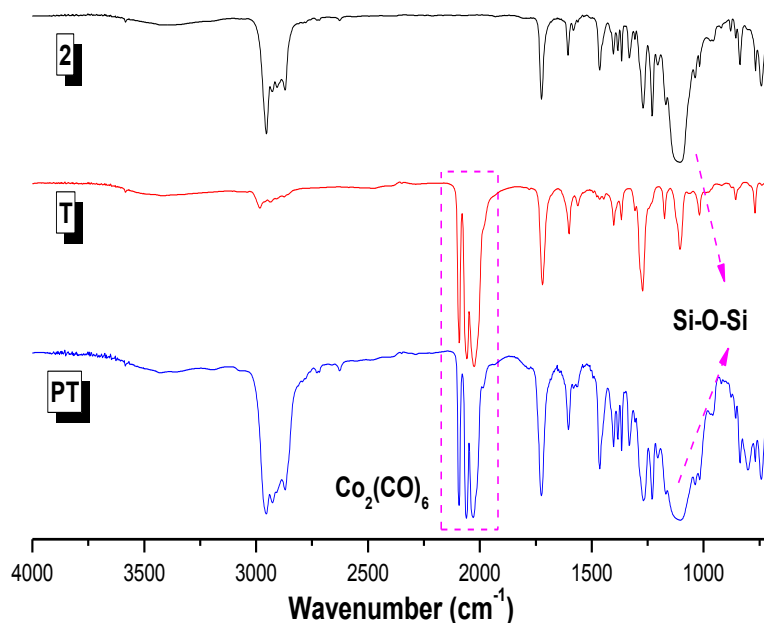

**Figure S1.** IR spectra of **2**, **T** and **PT**.

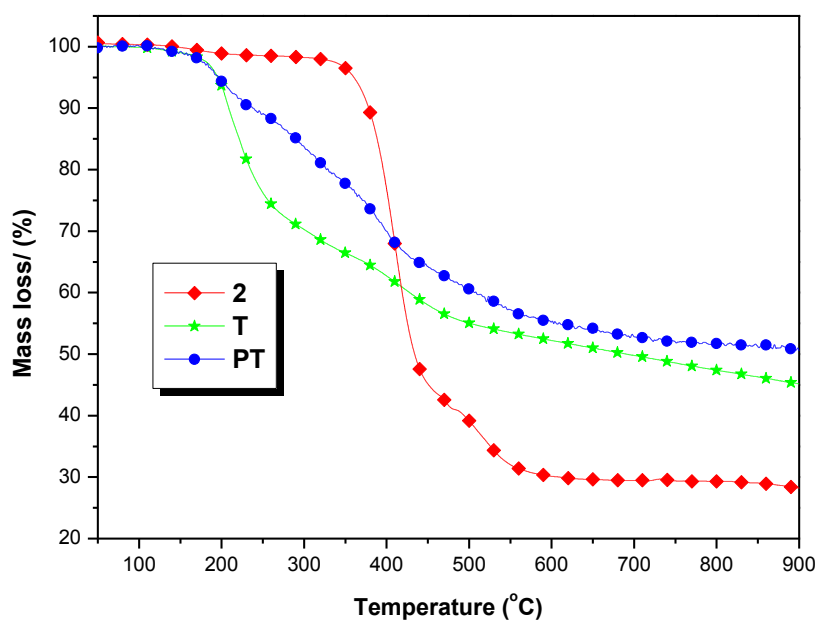

**Figure S2.** TGA thermograms of **2**, **T** and **PT** measured under nitrogen at a heating rate of 10 °C min<sup>-1</sup>.

### Thermal properties and pyrolysis program

The pyrolysis program, such as heating rate, temperature and holding time had a significant influence on the structure of the yielded CNPs. Generally, the samples were first heated to their decomposition temperature of the Co-carbonyl groups and held at this temperature for several hours, then heated to a high temperature and held there for another several hours. In order to determine our pyrolysis program, the thermal properties of compounds **2**, **T** and **PT** were investigated by using

thermogravimetric analysis. The thermal-decomposition temperatures ( $T_d$ , corresponding to 5% weight loss) of **T** and **PT** were  $\sim 180$  °C. Thus, we determined the pyrolysis program as following: powders of the organometallic precursor were placed in quartz tubes sealed under high vacuum, then suffered to different heating programs in a furnace. The samples were first heated slowly to their decomposition temperature  $180$  °C, held for two hours to ensure the completely decomposition of the Co complexes, and then heated to a higher temperature where the sample was held for several hours. After slowly cooled to room temperature, the obtained products were characterized by using powder X-ray diffraction (XRD), scanning electron (SEM) and transmission electron (TEM) microscopy, energy-dispersive spectroscopy (EDS) and vibrating sample magnetometer.

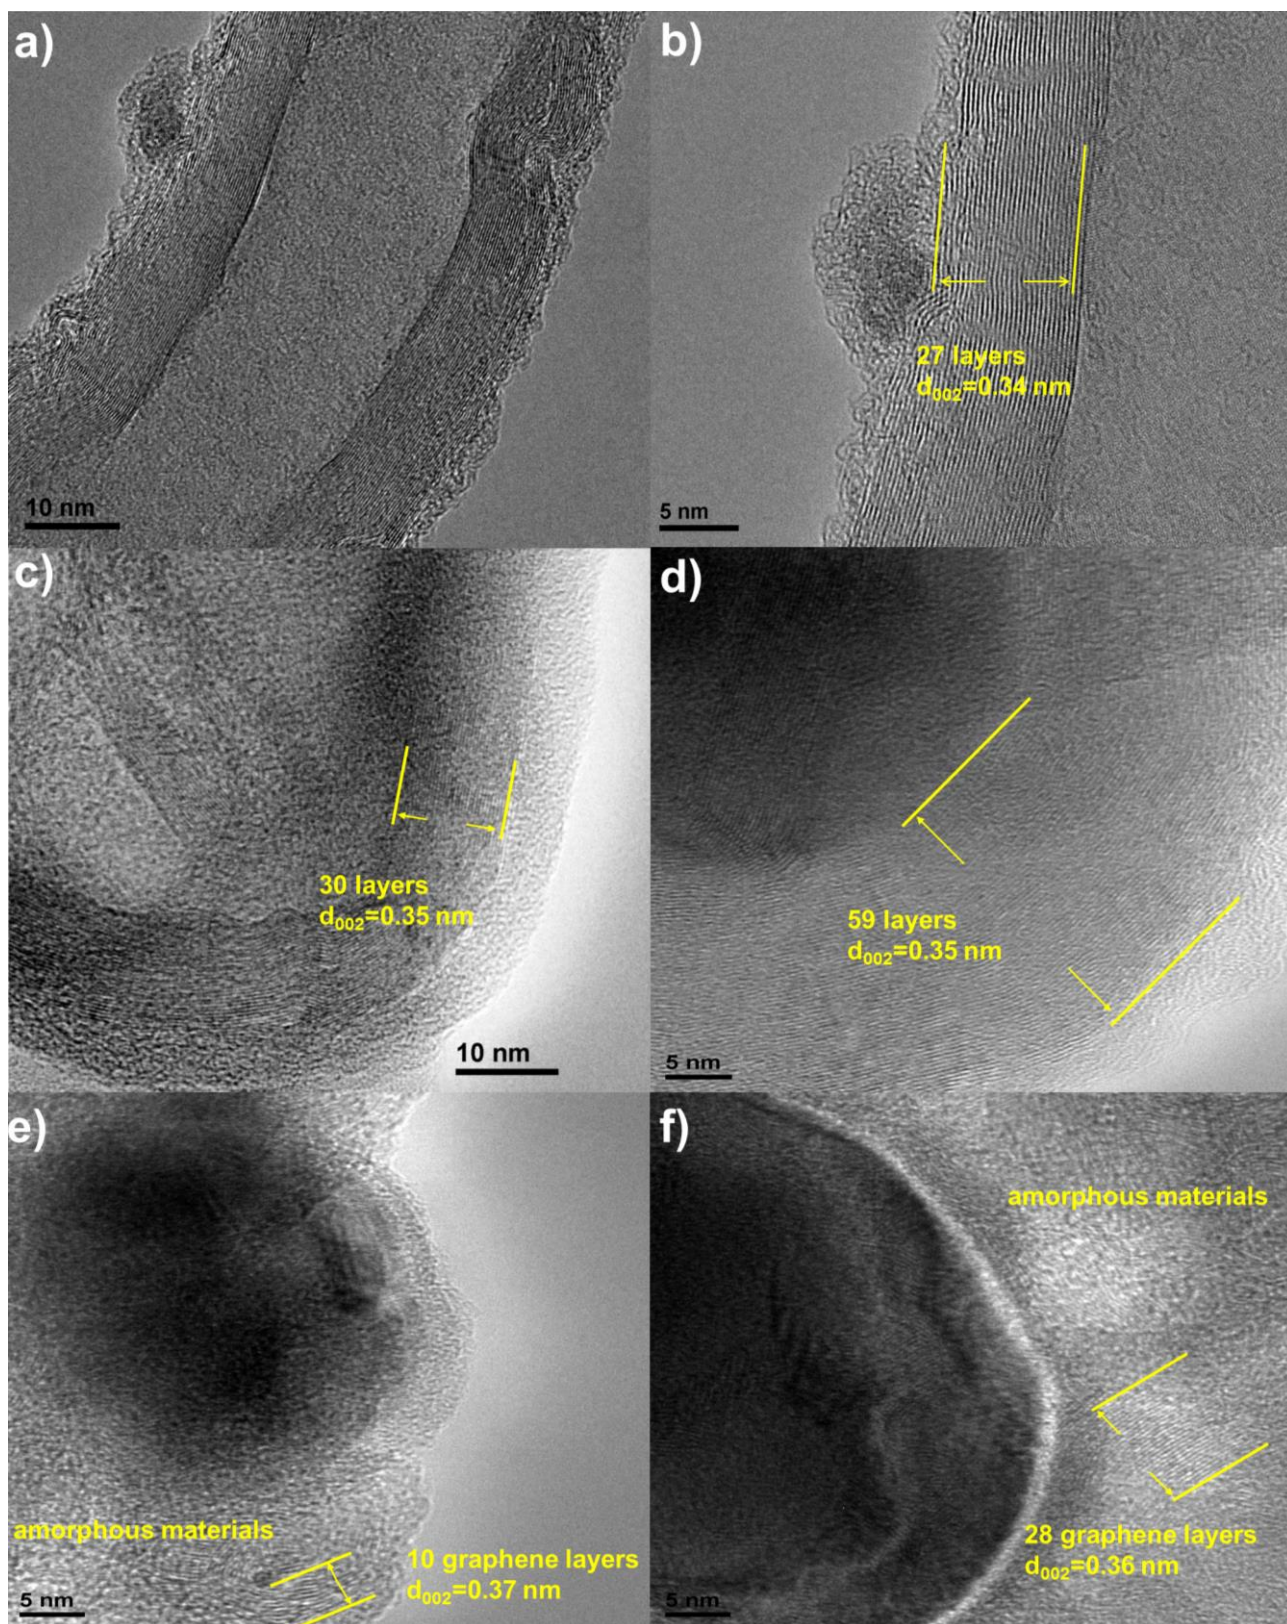

**Figure S3.** HRTEM images of the materials obtained through thermolysis of **T** and **PT**. (a, b) for **T-700-24h**; (c, d) for **T-850-8h**; (e) for **PT-700-24h**; (f) for **PT-850-8h**.

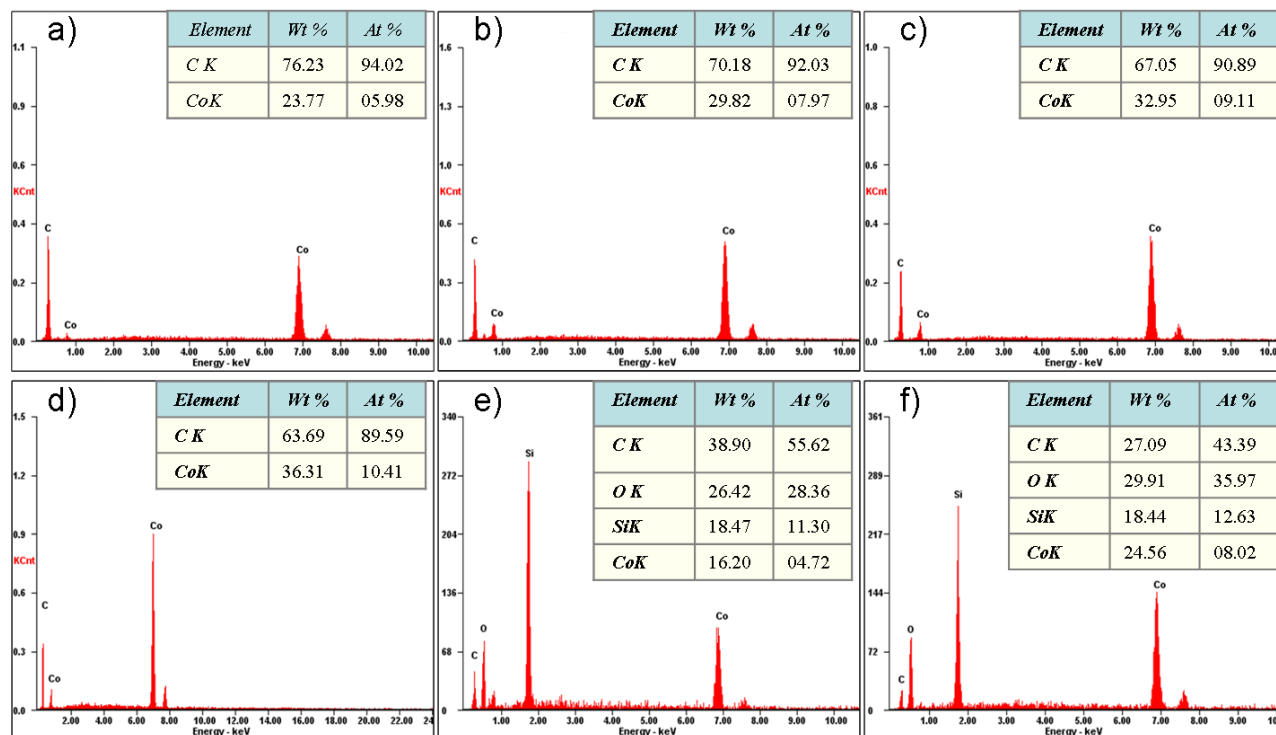

**Figure S4.** SEM-EDX spectra of the materials obtained through thermolysis of compounds: a) T-700-8h, b) T-700-24h, c) T-800-8h, d) T-850-8h, e) PT-700-24h and f) PT-850-8h.

**Table S1.** Compositions of organometallic precursors and their pyrolysis products.

| sample            | C (%) | Co(%) | Si(%)        | O(%) |
|-------------------|-------|-------|--------------|------|
| <b>T</b>          | 47.1  | 24.3  | 0.00         | 26.4 |
| <b>T-700-8h</b>   | 76.2  | 23.8  | <sup>a</sup> | -    |
| <b>T-700-24h</b>  | 70.2  | 29.8  | -            | -    |
| <b>T-800-8h</b>   | 67.0  | 33.0  | -            | -    |
| <b>T-850-8h</b>   | 63.7  | 36.3  | -            | -    |
| <b>PT</b>         | 43.9  | 9.0   | 17.1         | 24.4 |
| <b>PT-700-24h</b> | 38.9  | 16.2  | 18.5         | 26.4 |
| <b>PT-850-8h</b>  | 27.1  | 24.6  | 18.4         | 29.9 |

<sup>a</sup>. The symbol of “-” represents the element was not detected.

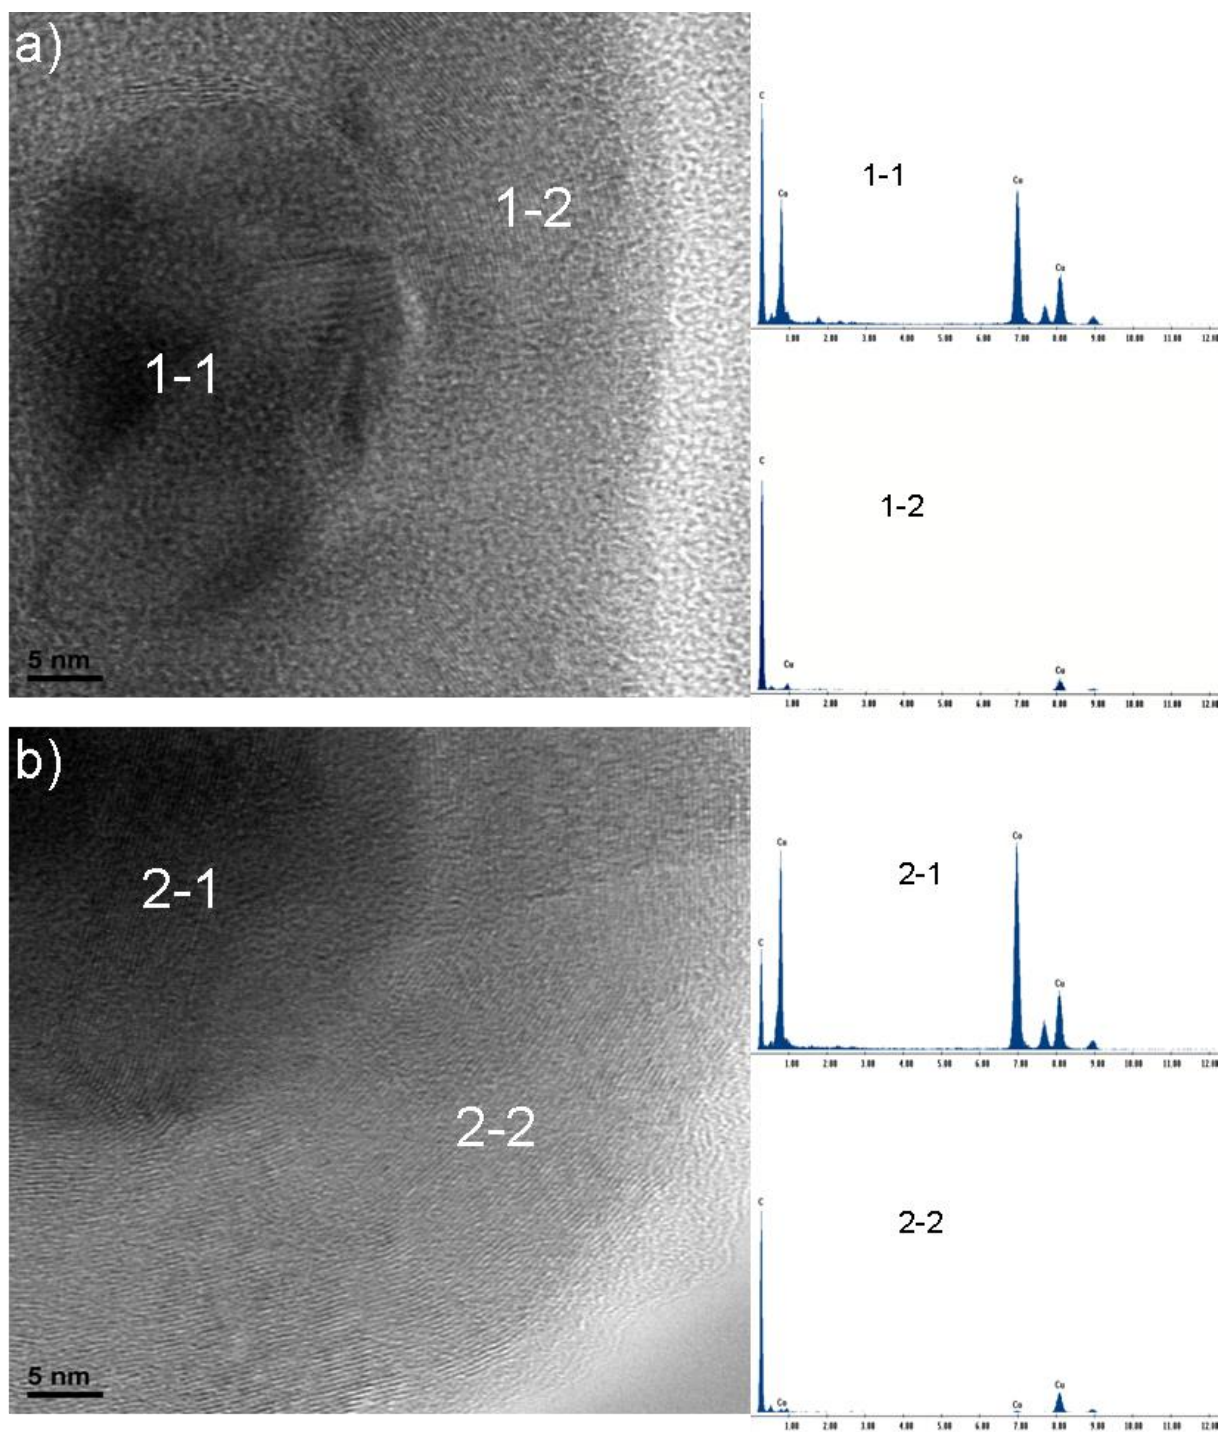

**Figure S5.** TEM-EDX spectra of (a) **T-700-24h** and (b) **T-850-8h**.

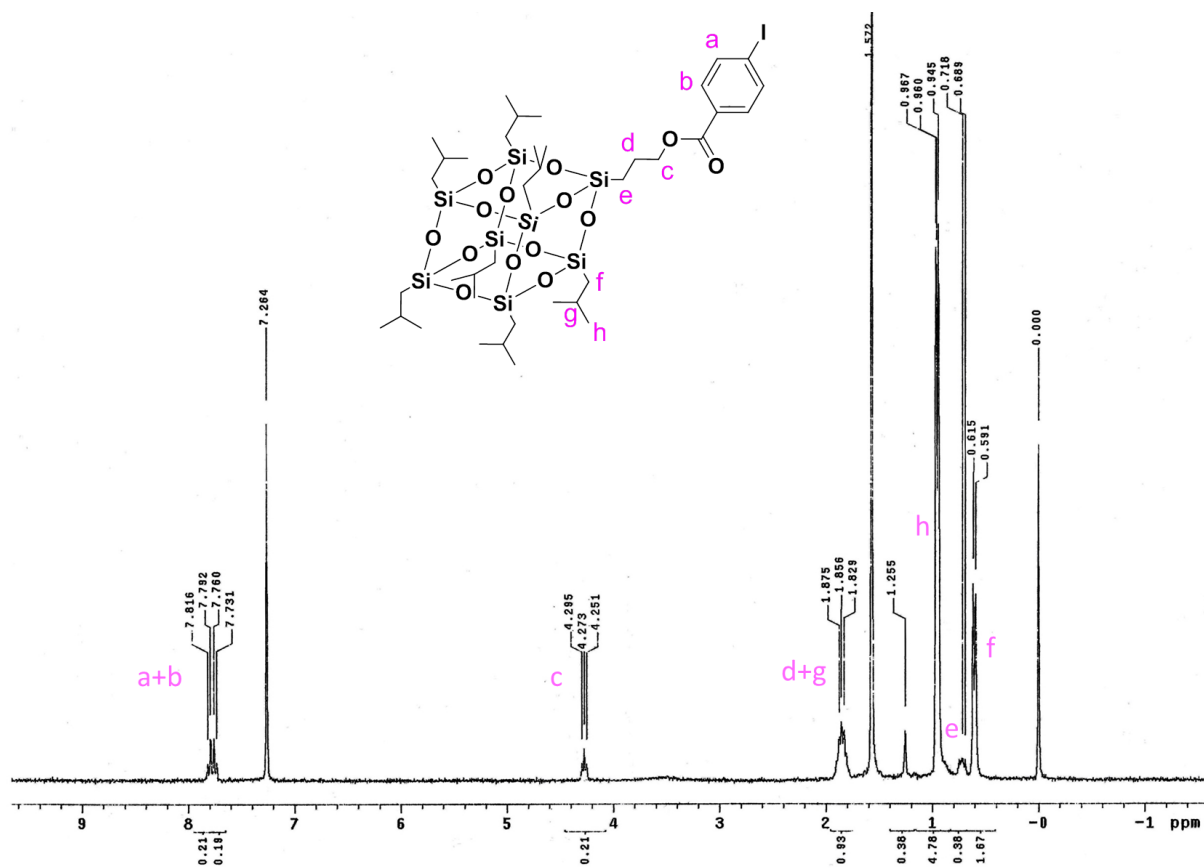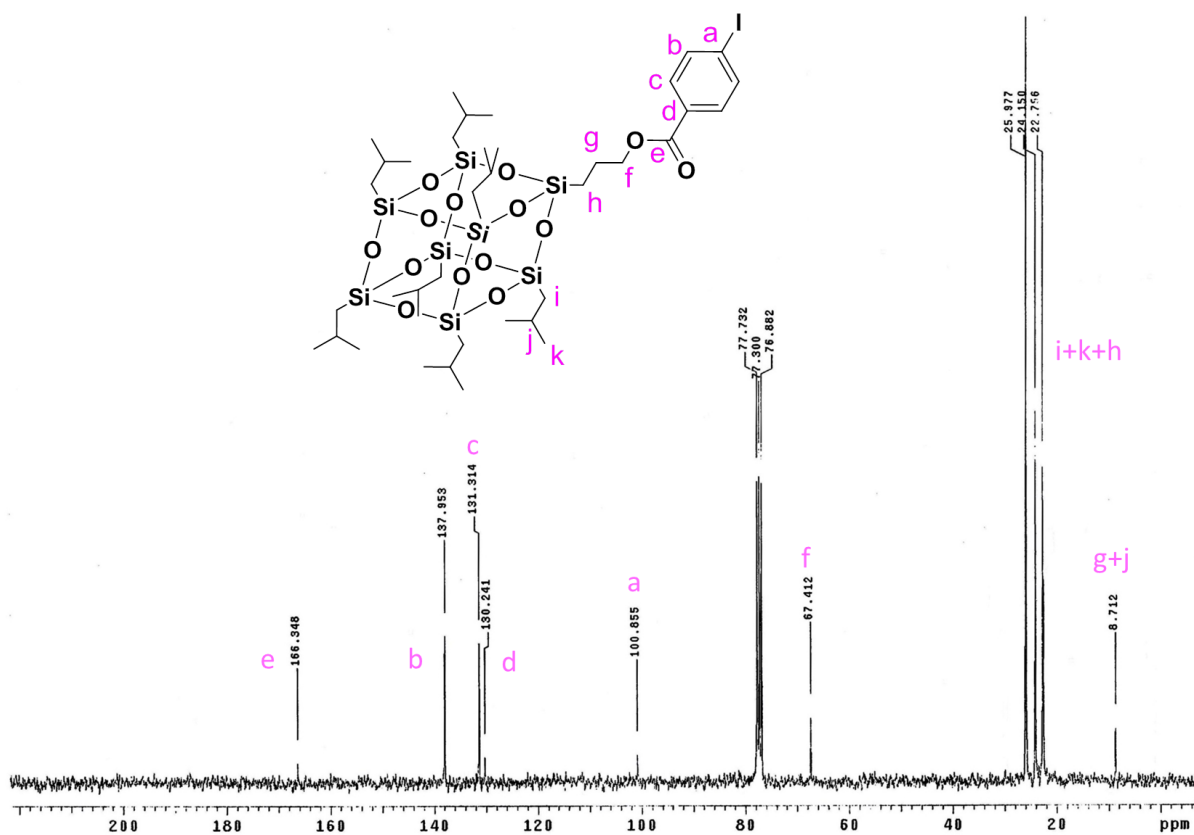

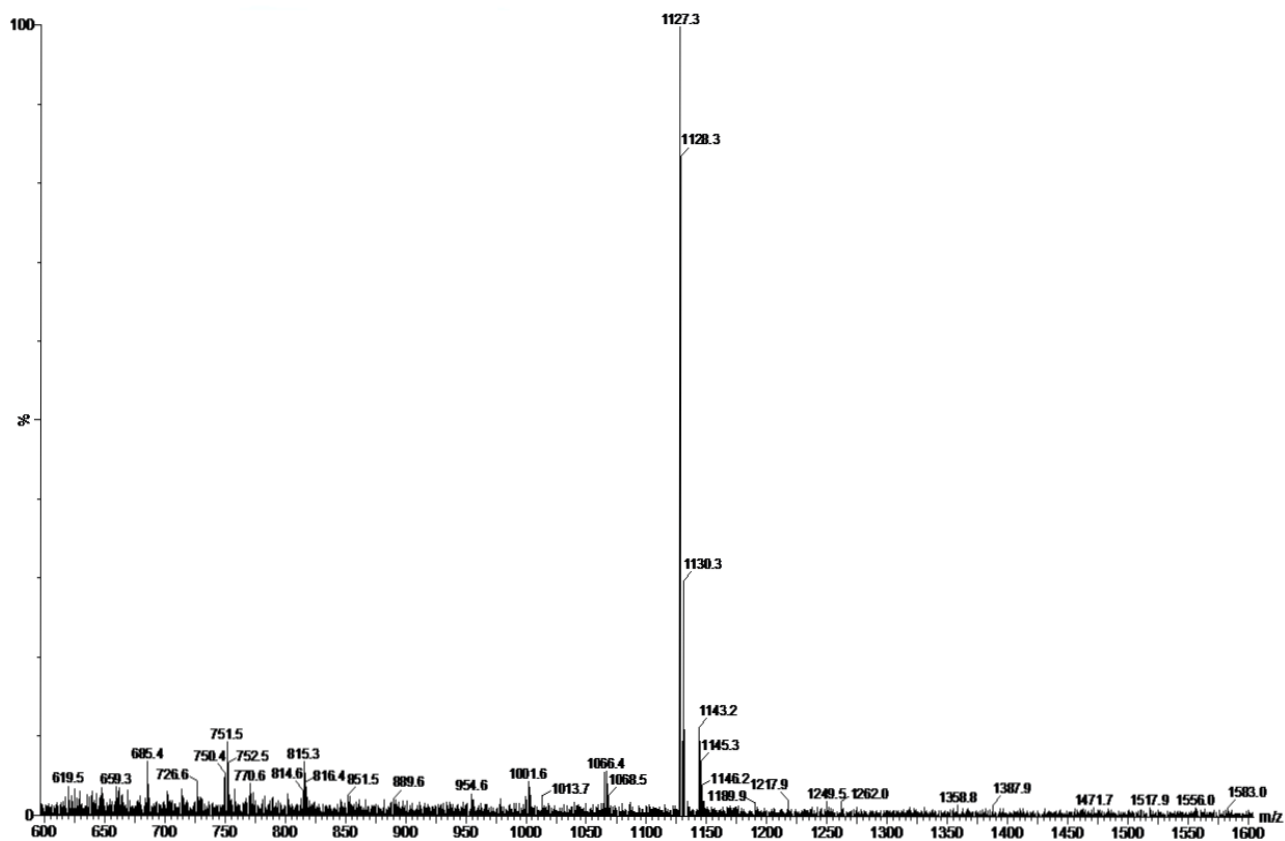

Figure S8. MALDI-TOF spectrum of **1**.

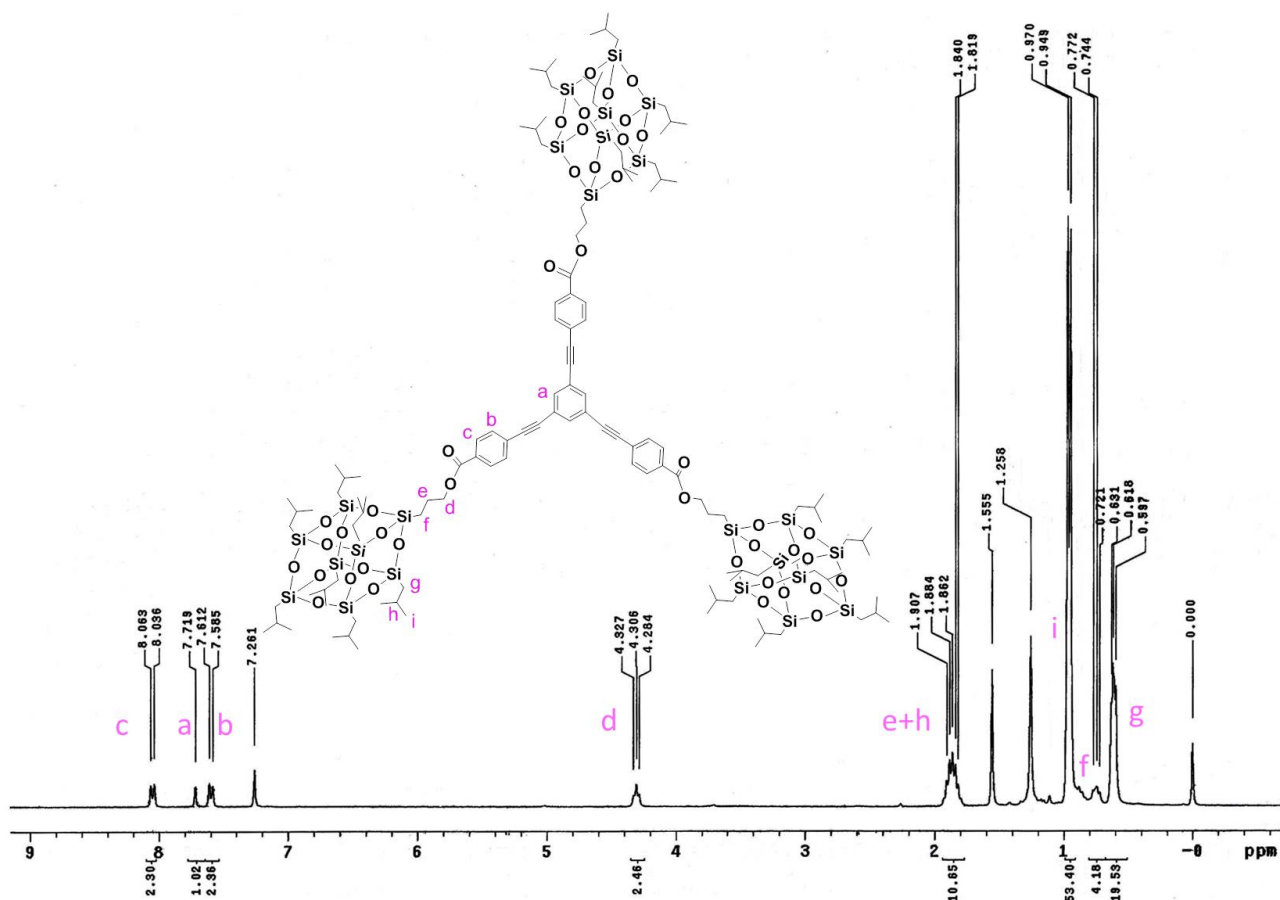

Figure S9. <sup>1</sup>H NMR spectrum of **2** in CDCl<sub>3</sub>.

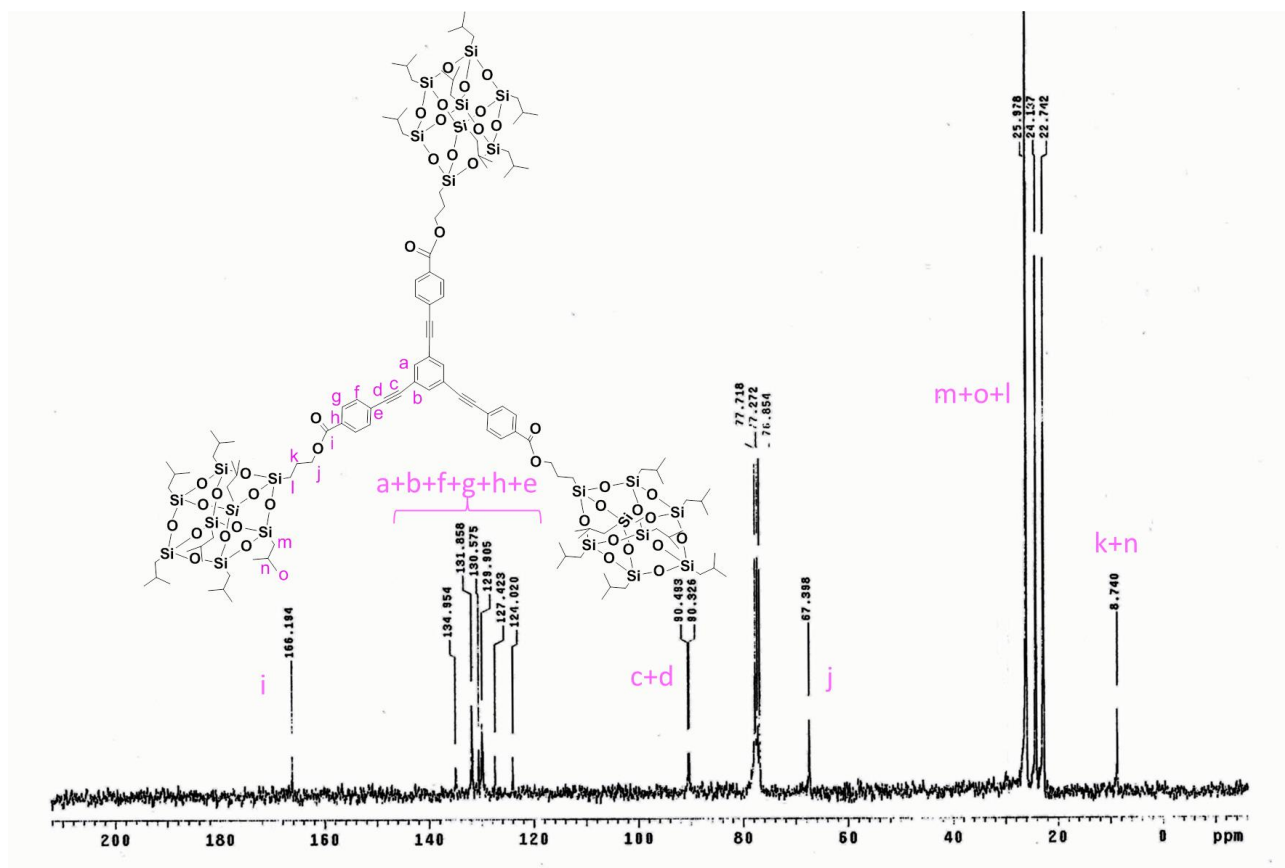

Figure S10. <sup>13</sup>C NMR spectrum of **2** in CDCl<sub>3</sub>.

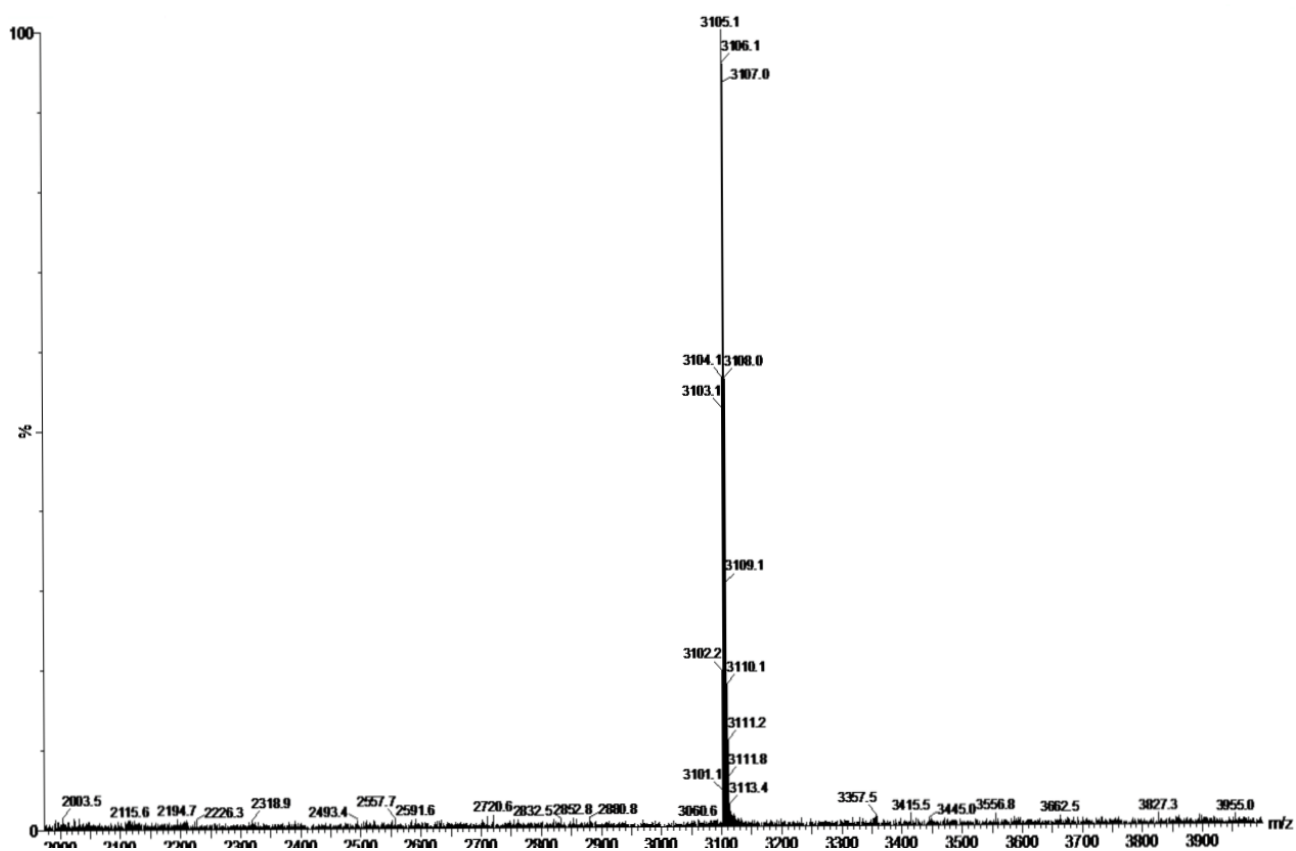

Figure S11. MALDI-TOF spectrum of **2**.

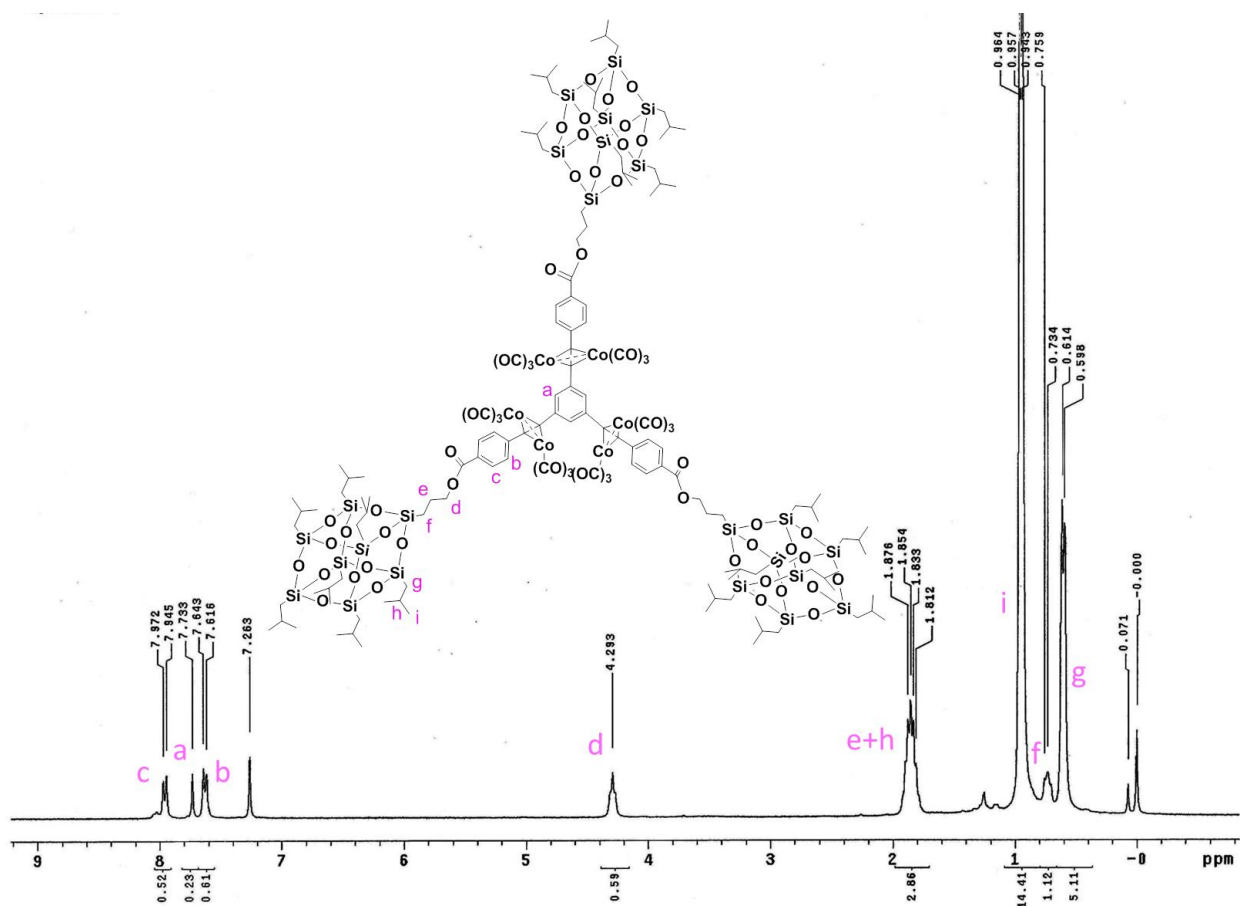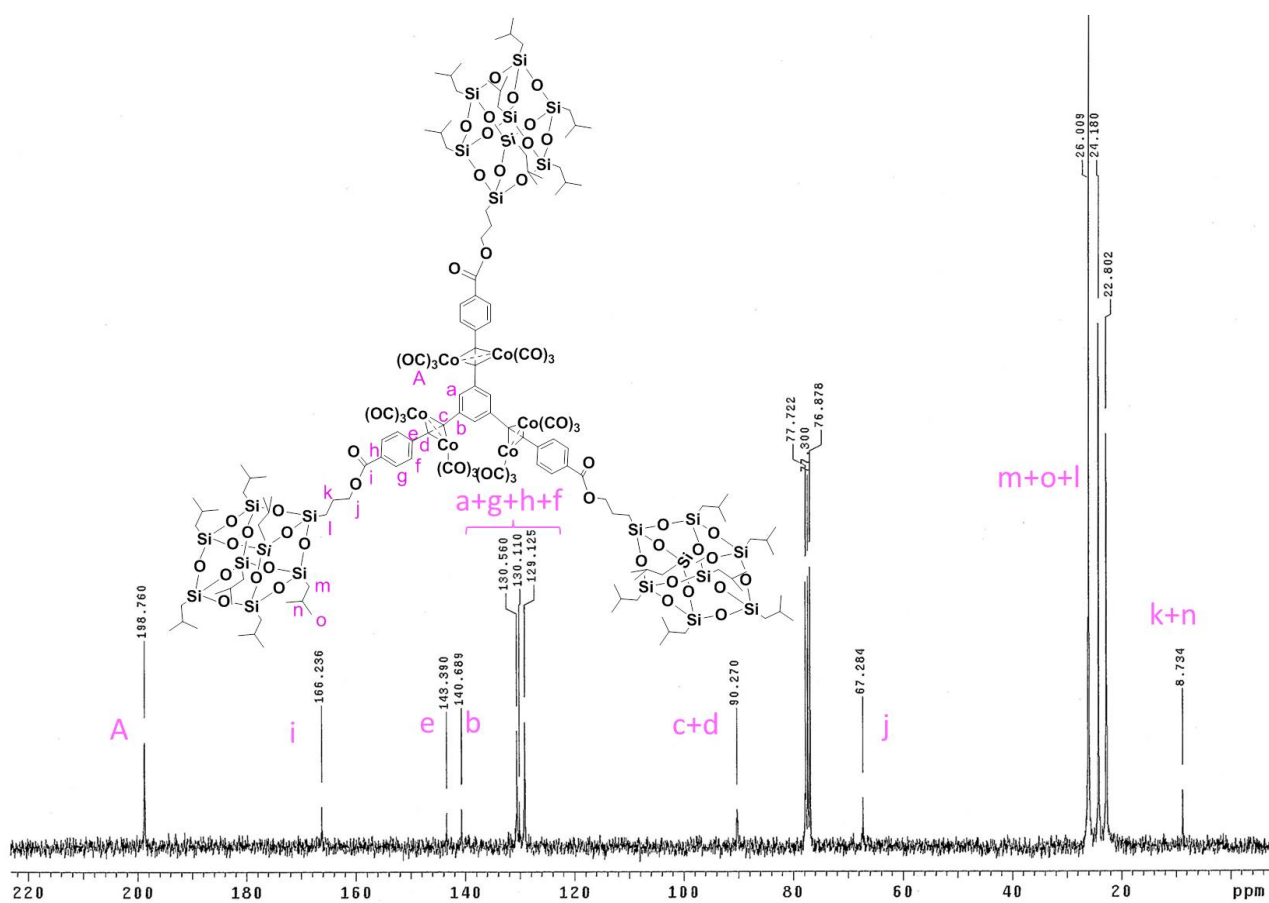

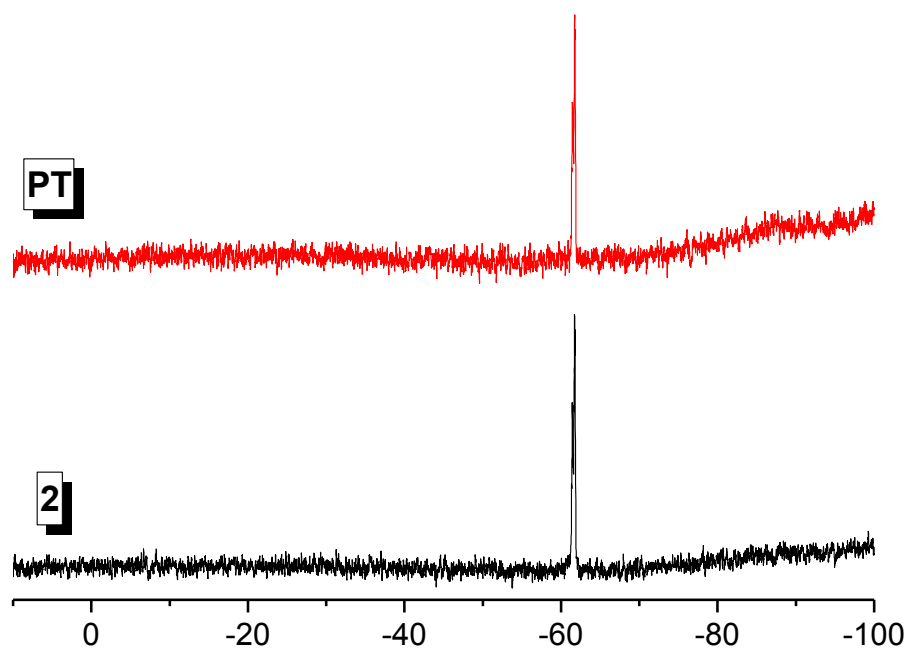

Figure S14.  $^{29}\text{Si}$  NMR spectra of **2** and **PT** in  $\text{CDCl}_3$ .
